# Supplementary material for: Human-induced greening of the northern extratropical land surface
Source: Springer Nature journal article supplement (doi:10.1038/nclimate3056), 2016-06-27
Supplement: 41558_2016_BFnclimate3056_MOESM475_ESM.pdf [file 41558_2016_BFnclimate3056_MOESM475_ESM.pdf]

# Human-induced greening of the northern extratropical land surface

4 Jiafu Mao<sup>1†</sup>, Aurélien Ribes<sup>2</sup>, Binyan Yan<sup>3</sup>, Xiaoying Shi<sup>1</sup>, Peter E. Thornton<sup>1</sup>, Roland  
5 Sférian<sup>2</sup>, Philippe Ciais<sup>4</sup>, Ranga B. Myneni<sup>5</sup>, Hervé Douville<sup>2</sup>, Shilong Piao<sup>6,7,8</sup>, Zaichun  
6 Zhu<sup>6</sup>, Robert E. Dickinson<sup>3</sup>, Yongjiu Dai<sup>9</sup>, Daniel M. Ricciuto<sup>1</sup>, Mingzhou Jin<sup>10</sup>, Forrest  
7 M. Hoffman<sup>11</sup>, Bin Wang<sup>12,13</sup>, Mengtian Huang<sup>6</sup>, and Xu Lian<sup>6</sup>

- 8  
9 [1] Environmental Sciences Division and Climate Change Science Institute, Oak Ridge  
10 National Laboratory, Oak Ridge, TN, USA  
11 [2] Centre National de Recherches Météorologiques, Météo-France/CNRS, 42 Avenue  
12 Gaspard Coriolis, 31057 Toulouse, France  
13 [3] Jackson School of Geosciences, the University of Texas, Austin, TX, USA  
14 [4] Laboratoire des Sciences du Climat et de l'Environnement, LSCE, 91191 Gif sur  
15 Yvette, France  
16 [5] Department of Earth and Environment, Boston University, Boston, MA 02215, USA  
17 [6] Sino-French Institute for Earth System Science, College of Urban and Environmental  
18 Sciences, Peking University, Beijing 100871, China  
19 [7] Key Laboratory of Alpine Ecology and Biodiversity, Institute of Tibetan Plateau  
20 Research, Chinese Academy of Sciences, Beijing 100085, China.  
21 [8] CAS Center for Excellence in Tibetan Plateau Earth Science, Beijing 100085, China  
22 [9] College of Global Change and Earth System Science, Beijing Normal University,  
23 Beijing, China  
24 [10] Department of Industrial and Systems Engineering, University of Tennessee,  
25 Knoxville, TN, USA  
26 [11] Computer Science and Mathematics Division and Climate Change Science Institute,  
27 Oak Ridge National Laboratory, Oak Ridge, TN 37831, USA  
28 [12] State Key Laboratory of Numerical Modeling for Atmospheric Sciences and  
29 Geophysical Fluid Dynamics, Institute of Atmospheric Physics, Beijing 100029, China  
30 [13] Center for Earth System Science, Tsinghua University, Beijing 100084, China  
31  
32  
33  
34  
35  
36  
37  
38  
39  
40  
41  
42  
43  
44  
45  
46  
47  
48  
49

50 ***Supporting Online Material***

51

52 ***Datasets and Method***

53 **(1) GIMMS LAI3g and GEOLAND2 LAI data**

54 The Global Inventory Modeling and Mapping Studies (GIMMS) LAI3g<sup>1</sup> dataset, spanning  
55 from July 1981 to December 2011 at the temporal resolution of 15 days and covering the  
56 globe at 1/12 degree spatial resolution, has been recently published. This product was  
57 generated using a neural network trained by GIMMS NDVI3g and filtered MODIS Leaf  
58 Area Index (LAI) products during the overlapping years. The GEOLAND2 project  
59 (<http://www.copernicus.eu/projects/geoland2>) developed a 30-year LAI product (1982 to  
60 present) with 10-day temporal resolution and 1/122° (about 1 km at the equator) spatial  
61 resolution<sup>2</sup>. Based on the neural network approach, this product was obtained from a  
62 combination of two sensors, NOAA-AVHRR (1982~1999) and SPOT-VGT  
63 (1999~present). The first component of the product was obtained from NOAA-AVHRR.  
64 The second component of the product, GEOLAND2/BioPar GEOV1 LAI, was developed  
65 from the SPOT/VGT sensor; it is distributed at <http://land.copernicus.eu/global/>. Both the  
66 LAI3g and GEOLAND2 LAI have been extensively evaluated with field measurements  
67 and other remote-sensing-based products, in terms of the mean states, multiyear  
68 variations, and responses to climate change. For model evaluations, environmental  
69 monitoring and assessment, and vegetation dynamics studies, the suitability of each has  
70 also been well documented and assessed<sup>1-7</sup>.

71

72 To more easily compare satellite LAI time series with earth system model (ESM)  
73 simulations, which have no gaps, and to consistently apply the growing season definition  
74 for observed and modeled LAI, we filled the gaps of the two LAI products. Gaps in both  
75 remote-sensing LAI time series resulting from the cloud coverage, algorithm failure, or  
76 low quality of source reflectance were filled following common practice published in  
77 previous work<sup>8,9</sup>. Generally, the short gaps (shorter than one year) were first filled using a  
78 cubic curve fitting according to the following criteria: (1) at least 35.0% of the data for the  
79 year are not missing, and (2) the gap is not located at the beginning or ending of the year.  
80 A 12-month window starting at any day of a year, instead of January 1 to December 31,  
81 was moved around the gap to be filled to obtain a “best” location for curve fitting. The  
82 “best” here refers to the condition that satisfies the above criteria and that contains the  
83 highest percentage of non-missing values. Long gaps were then filled using the  
84 climatological mean. Resultant data were then remapped to a coarser spatial resolution  
85 (2°×2°) for detection and attribution. The decrease of pixel size toward the poles due to  
86 the curvature of the earth was considered in the spatial resampling process. Similar to that  
87 documented in ref. 10, the annual growing season LAIs were derived by averaging the  
88 LAIs of growing-season months, which are defined as April–October, May–October, or  
89 May–September within a given year.

90

91 **(2) Prognostic LAI of CMIP5 models**

92 We used monthly mean LAI results from 19 fully-coupled ESMs participating in the  
93 CMIP5 project<sup>11</sup> (Table S1). They comprise a set of simulations: ALL, with historical  
94 anthropogenic and natural forcings (solar variability and volcanic aerosols as well as well-  
95 mixed greenhouse gases plus other anthropogenic factors such as aerosols, land use/land  
96 cover change (LULCC) and/or ozone), GHG, with greenhouse gases forcing only  
97 (anthropogenic well-mixed greenhouse gases), NAT, with natural forcings only (solar  
98 variability and volcanic aerosols), and unforced preindustrial control simulations (CTL,  
99 internal variability only).

100

101 Since not all models provide historical simulations extending to year 2011, the  
102 Representative Concentration Pathway (RCP) 4.5 simulations were used to extend the  
103 ALL simulations over the years 2006 to 2011. To discuss the possible impacts of CO<sub>2</sub>  
104 fertilization and greenhouse gas radiative effects on the LAI dynamics, we also analyzed  
105 the esmFixClim2 (radiation code sees constant CO<sub>2</sub> concentration of year 1850, but  
106 carbon cycle sees historical followed by RCP4.5 rise in CO<sub>2</sub>) and esmFdbk2 (carbon cycle  
107 sees constant CO<sub>2</sub> concentration of year 1850, but radiation sees historical followed by  
108 RCP4.5 rise in CO<sub>2</sub>) experiments. Results were shown from 18 models and 43 runs for  
109 ALL, 6 models and 17 runs for NAT, 5 models and 15 runs for GHG, 6 models and 6 runs  
110 for esmFixClim2, and 4 models and 4 runs for esmFdbk2.

111  
112 The multi-realization mean of each model/forcing was used for analysis. The simulations  
113 were resampled to a 2°×2° spatial resolution. The regional mean growing-season LAIs  
114 were calculated for each model/forcing group according to the growing season definition  
115 using the same approach as the satellite observations for all historical simulations. Based  
116 on the annual time series of the regionally averaged growing-season LAIs, 3-year  
117 averaged LAIs were calculated, resulting in 10 time steps for the 1982–2011 period. The  
118 CTL simulations contain LAI time series with different lengths up to 1000 years,  
119 corresponding to multiple 30-year segments.

120

### 121 **(3) Comparison of observed and simulated LAI trends**

122 The statistical tests used to compare observed and simulated trends (the fourth paragraph  
123 of the main text) are chi-square tests constructed as follows. We assume  $n$  simulations  
124 (either unforced 30-year segments or individual historical simulations)  $x_1, \dots, x_n$  are  
125 available, independent, and identically distributed, following a Gaussian distribution. We  
126 wonder whether the observed value  $y$  is consistent with the distribution of the  $x_i$ . The  
127 statistical test we used is derived from

$$(y - \bar{x}) \sim N(0, (1 + 1/n)\sigma^2)$$

128 where  $\bar{x}$  is the sample mean of the  $(x_i)$ . This test is based on the statistic

$$s = \frac{n}{n+1} \frac{(y - \bar{x})^2}{\hat{\sigma}^2} \sim F(1, n-1)$$

129 Confidence intervals on model-simulated trends are computed with the same approach, at  
130 the 90% level.

131

### 132 **(4) Robustness of detection to inflated IV assumptions**

133 The rejection of the residual consistency test (RCT), which was found in most cases,  
134 might be related to an underestimation of IV by current ESMs. In order to address this  
135 possible weakness of our analysis, we investigated the robustness of our results to using  
136 inflated estimates of IV. In that investigation, the covariance structure is still estimated  
137 from climate model CTL simulations, but its magnitude is revised and inflated.

138

139 This test is done in a simplified statistical framework where the response pattern is  
140 assumed to be known and linear in time (i.e., the response pattern simulated by climate  
141 models is not used). In this way, we study the significance of the linear trend. The multi-  
142 model mean response shown in Fig. 2 is very close to being linear over the 30-year period.  
143 The statistical regression model is then fitted using an ordinary least square (OLS)  
144 algorithm<sup>12,13</sup> where the expected response  $X^*$  is considered as being known, related to the

145 following two reasons. First, one approach used here (case Lin\_Σobs) is to estimate the  
146 magnitude of the variance in  $\Sigma$  directly from the observed data. This cannot be done under  
147 total least square (TLS), as TLS requires the ratio of variances in  $\Sigma$  and  $\Sigma_X$  to be known<sup>14</sup>.  
148 Second, the use of the TLS approach is not required if a fixed response pattern is assumed,  
149 as is done here with a time-linear response. Such a parametric assumption is, at worst,  
150 suboptimal, and may reduce the chance to successfully detect a change.

151

152 The results obtained with this sensitivity analysis are shown in Fig. S5 for the April to  
153 October mean LAI (consistent with the main text and Fig. 4), and in Fig. S6 for alternative  
154 seasons. In terms of attributable trend, the results obtained using this simpler method, and  
155 an estimate of IV derived from model simulations (Lin\_Σmod in Fig. S5), are very close  
156 to those found with the Multi1 ALL response (Fig. 4). When the magnitude of IV is  
157 estimated from observations instead of from climate models (Lin\_Σobs, Fig. S5), the  
158 estimated variance is about 2.5 times larger, and the confidence intervals on the scaling  
159 factors are widened. However, the detection of the response to external forcings (i.e.,  $\beta \neq$   
160 0) remains very clear. The most important difference caused by the inflated IV comes  
161 from the RCT, which is then well passed. This enhances confidence in our result, as  
162 detection is shown to be robust if a higher, observationally based estimate of IV is  
163 considered. To further our investigation, we apply the same method using a simulated  
164 variance inflated by a factor of 8 (Lin\_8×Σmod, Fig. S5). With such a large inflation of  
165 IV, the (2-sided) RCT is rejected again, but this time because the regression residuals are  
166 found to be significantly smaller than expected when such a large IV is assumed. In this  
167 way, we are dealing with an upper bound of internal variability. Detection is still found to  
168 be significant, although barely. This again strengthens confidence in the detection of  
169 recent LAI changes.

170

## 171 **References**

- 172 1. Zhu, Z. *et al.* Global data sets of vegetation leaf area index (LAI) 3g and fraction of  
173 photosynthetically active radiation (FPAR) 3g derived from global inventory modeling  
174 and mapping studies (GIMMS) normalized difference vegetation index (NDVI3g) for  
175 the period 1981 to 2011. *Rem. Sens.* **5**, 927–948 (2013).
- 176 2. Baret, F. *et al.* GEOV1: LAI and FAPAR essential climate variables and FCOVER  
177 global time series capitalizing over existing products. part1: Principles of development  
178 and production. *Rem. Sens. Environ.* **137**, 299–309 (2013).
- 179 3. Camacho, F. *et al.* GEOV1: LAI, FAPAR essential climate variables and FCOVER  
180 global time series capitalizing over existing products. Part 2: Validation and  
181 intercomparison with reference products. *Rem. Sens. Environ.* **137**, 310–329 (2013).
- 182 4. Murray-Tortarolo, G. *et al.* Evaluation of land surface models in reproducing satellite-  
183 derived LAI over the high-latitude Northern Hemisphere. Part I: Uncoupled DGVMs,  
184 *Rem. Sens.* **5**, 4819–4838 (2013).
- 185 5. Anav, A. *et al.* Evaluation of land surface models in reproducing satellite derived leaf  
186 area index over the high-latitude northern hemisphere. part II: earth system models.  
187 *Rem. Sens.* **5**, 3637–3661 (2013).
- 188 6. Mahowald, N. *et al.* Projections of leaf area index in earth system models. *Earth Syst.*  
189 *Dynam.* **7**, 211–229, doi:10.5194/esd-7-211-2016 (2016).
- 190 7. Mao, J. *et al.* Global latitudinal-asymmetric vegetation growth trends and their driving  
191 mechanisms: 1982–2009. *Rem. Sens.* **5**, 1484–1497 (2013).
- 192 8. Verger A. *et al.* The CACAO method for smoothing, gap filling, and characterizing  
193 seasonal anomalies in satellite time series. *IEEE Trans. Geosci. Remote Sens.* **51**,  
194 1963–1972 (2013).

- 195 9. Weiss, D. J. *et al.* An effective approach for gap-filling continental scale remotely  
196 sensed time-series. *Isprs Journal of Photogrammetry and Remote Sensing* **98**, 106–118  
197 (2014).
- 198 10. Piao, S. *et al.* Evidence for a weakening relationship between interannual temperature  
199 variability and northern vegetation activity. *Nature Commun.* **5**, 5018 (2014).
- 200 11. Taylor, K. E., Stouffer, R. J. and Meehl, G. A. An overview of CMIP5 and the  
201 experiment design. *Bull. Amer. Meteor. Soc.* **93**, 485–498 (2012).
- 202 12. Allen, M. and Stott, P. Estimating signal amplitudes in optimal fingerprinting, part I:  
203 theory. *Clim. Dynam.* **21**, 477–491 (2003).
- 204 13. Ribes, A. Planton, S. and Terray, L. Application of regularised optimal fingerprinting  
205 to attribution. part I: method, properties and idealised analysis. *Clim. Dynam.* **41**, 2817–  
206 2836 (2013).
- 207 14. Wald, A. The fitting of straight lines if both variables are subject to error. *Ann. Math.*  
208 *Stat.* **11**, 284–300 (1940).

**Table S1.** The coupled model name, modeling center information, name of the land surface model in the coupled model, horizontal resolution (latitude/longitude) of the land surface model, nitrogen dynamics information of the land surface model, prognostic vegetation coverage information of the land surface model, length (years) of the preindustrial unforced control (CTL) simulations, the availability of CMIP5 simulations (historical) with anthropogenic and natural forcings (ALL), the availability of CMIP5 simulations (historicalNat) with natural forcings alone (NAT), the availability of CMIP5 simulations (historicalGHG) simulations with greenhouse gases forcings (GHG), the availability of CMIP5 simulations (esmFixClim2) with radiation code seeing constant CO<sub>2</sub> concentration of year 1850, but carbon cycle seeing historical followed by RCP4.5 rise in CO<sub>2</sub>, the availability of CMIP5 simulations (esmFdbk2) carbon cycle seeing constant CO<sub>2</sub> concentration of year 1850, but radiation seeing historical followed by RCP4.5 rise in CO<sub>2</sub>, and the availability of CMIP5 simulations (historicalMisc) with Land Use/Land Cover Change (LULCC) for 1982-2011.

| Model          | Modeling Group                                                     | Land Component      | Land Resolution | N-cycle | Dynamic vegetation | piControl Length | historical (43) | historical Nat (17) | historical GHG (15) | esmFixClim2 (6) | esmFdbk2 (4) | historical Misc (5) |
|----------------|--------------------------------------------------------------------|---------------------|-----------------|---------|--------------------|------------------|-----------------|---------------------|---------------------|-----------------|--------------|---------------------|
| bcc-csm1-1     | Beijing Climate Center, China Meteorological Administration, CHINA | BCC_AVIM1.0         | 2.875° × 2.875° | N       | N                  | 500              | 3               | 1                   | 1                   | 1               | 1            |                     |
| bcc-csm1-1-m   | Beijing Climate Center, China Meteorological Administration, CHINA | BCC_AVIM1.0         | 2.875° × 2.875° | N       | N                  | 400              | 3               |                     |                     |                 |              |                     |
| CanESM2        | Canadian Center for Climate Modelling and Analysis, CANADA         | CLASS2.7&CT EMI     | 2.81° × 2.81°   | N       | N                  | 996              | 5               | 5                   | 5                   | 1               | 1            | 5                   |
| CCSM4          | National Center for Atmospheric Research (NCAR), USA               | CLM4                | 0.9° × 1.25°    | Y       | N                  | 1051             | 6               |                     |                     |                 |              |                     |
| CESM1-BGC      | Community Earth System Model Contributors, NSF-DOE-NCAR, USA       | CLM4                | 0.9° × 1.25°    | Y       | N                  |                  | 1               |                     |                     |                 |              |                     |
| CESM1-CAM5     | Community Earth System Model Contributors, NSF-DOE-NCAR, USA       | CLM4                | 0.9° × 1.25°    | Y       | N                  | 319              | 3               |                     |                     |                 |              |                     |
| CESM1-WACCM    | Community Earth System Model Contributors, NSF-DOE-NCAR, USA       | CLM4                | 0.9° × 1.25°    | Y       | N                  | 200              | 3               |                     |                     |                 |              |                     |
| GFDL-ESM2M     | NOAA Geophysical Fluid Dynamics Laboratory, USA                    | LM3                 | 2.5° × 2.5°     | N       | Y                  | 500              |                 |                     |                     | 1               |              |                     |
| HadGEM2-CC     | Met Office Hadley Centre, UNITED KINGDOM                           | JULES               | 1.25° × 1.875°  | N       | Y                  | 240              | 1               |                     |                     |                 |              |                     |
| HadGEM2-ES     | Met Office Hadley Centre, UNITED KINGDOM                           | JULES               | 1.25° × 1.875°  | N       | Y                  | 576              | 4               | 4                   | 4                   | 1               | 1            |                     |
| IPSL-CM5A-LR   | Institut Pierre-Simon Laplace, FRANCE                              | ORCHIDEE            | 3.75° × 1.9°    | N       | N                  | 1000             | 4               | 3                   | 4                   | 1               | 1            |                     |
| IPSL-CM5A-MR   | Institut Pierre-Simon Laplace, FRANCE                              | ORCHIDEE            | 2.5° × 1.25°    | N       | N                  | 300              | 1               | 3                   |                     |                 |              |                     |
| IPSL-CM5B-LR   | Institut Pierre-Simon Laplace, FRANCE                              | ORCHIDEE            | 3.75° × 1.9°    | N       | N                  | 300              | 1               |                     |                     |                 |              |                     |
| MIROC-ESM-CHEM | JAMSTEC, University of Tokyo, and NIES, JAPAN                      | MATSIRO & SEIB-DGVM | 2.875° × 2.875° | N       | Y                  | 255              | 1               |                     |                     |                 |              |                     |
| MIROC-ESM      | JAMSTEC, University of Tokyo, and NIES, JAPAN                      | MATSIRO & SEIB-DGVM | 2.875° × 2.875° | N       | Y                  | 630              | 1               |                     |                     | 1               |              |                     |
| MPI-ESM-LR     | Max Planck Institute for Meteorology, GERMANY                      | JSBACH              | 1.9° × 1.9°     | N       | Y                  | 1000             | 3               |                     |                     |                 |              |                     |
| MPI-ESM-MR     | Max Planck Institute for Meteorology, GERMANY                      | JSBACH              | 1.9° × 1.9°     | N       | Y                  | 1000             | 1               |                     |                     |                 |              |                     |
| NorESM1-ME     | Norwegian Climate Centre, NORWAY                                   | CLM4                | 1.9° × 2.5°     | Y       | N                  | 252              | 1               |                     |                     |                 |              |                     |
| NorESM1-M      | Norwegian Climate Centre, NORWAY                                   | CLM4                | 1.9° × 2.5°     | Y       | N                  | 501              | 1               | 1                   | 1                   |                 |              |                     |



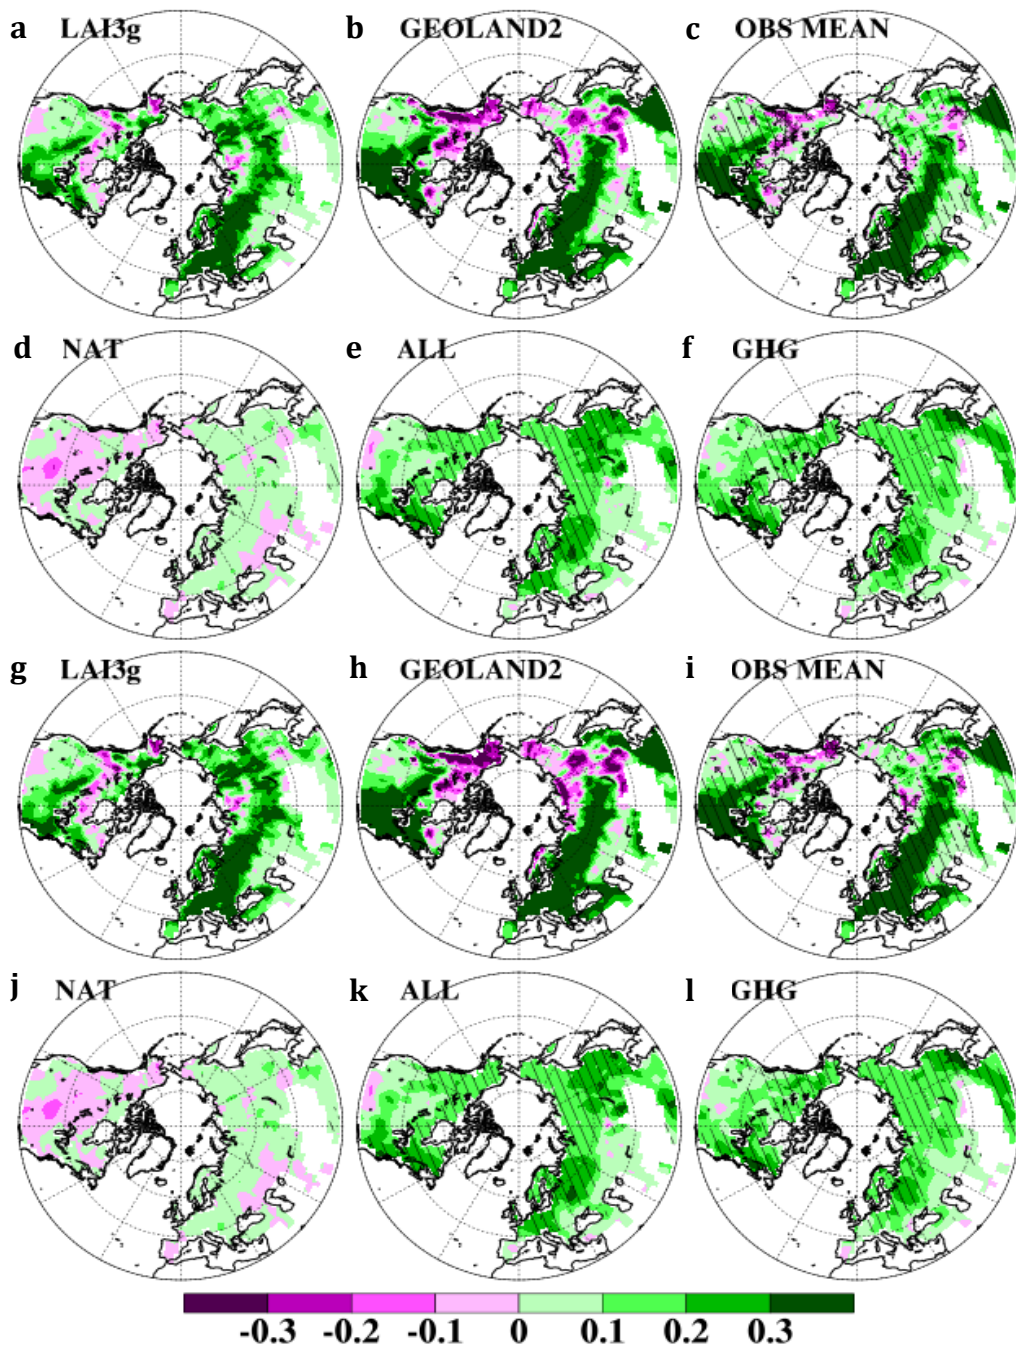

**Figure S1.** This figure is similar to Fig. 1, but it considers different definitions of the growing season LAI (a–f for May–October [M2O], g–l for May–September [M2S]).

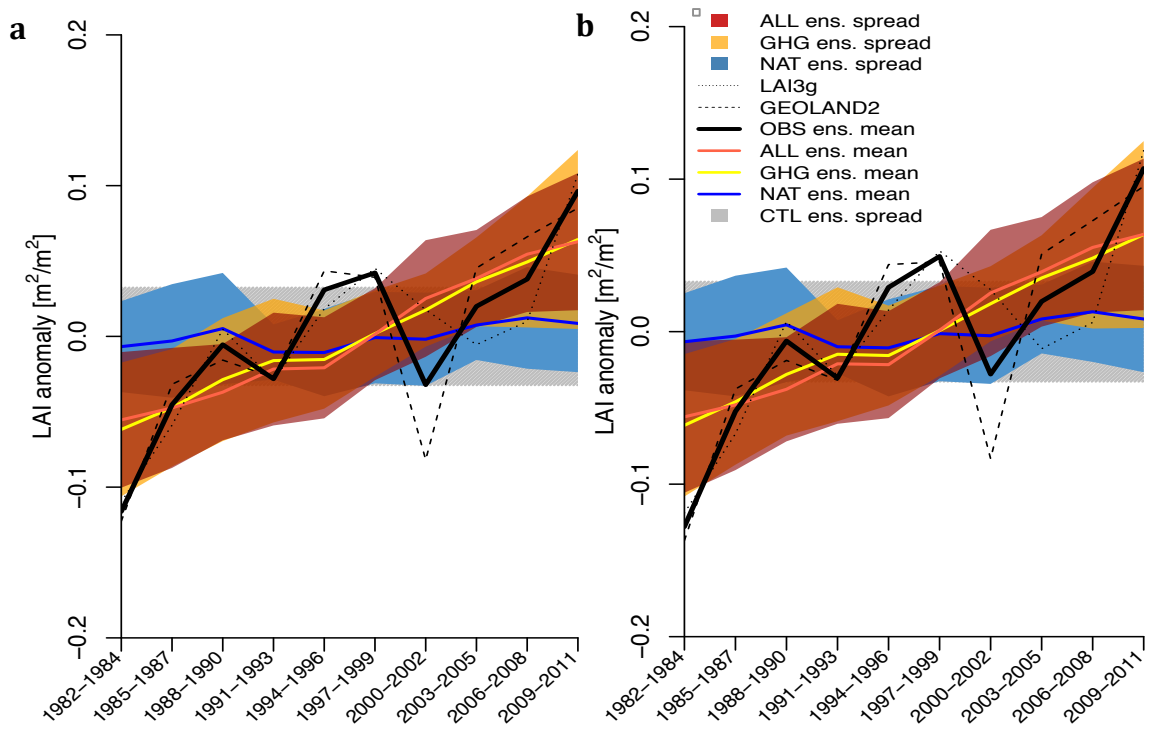

**Figure S2.** This is similar to Fig. 2, but it considers different definitions of the growing season LAI (a, for May–October [M2O], b for May–September [M2S]).



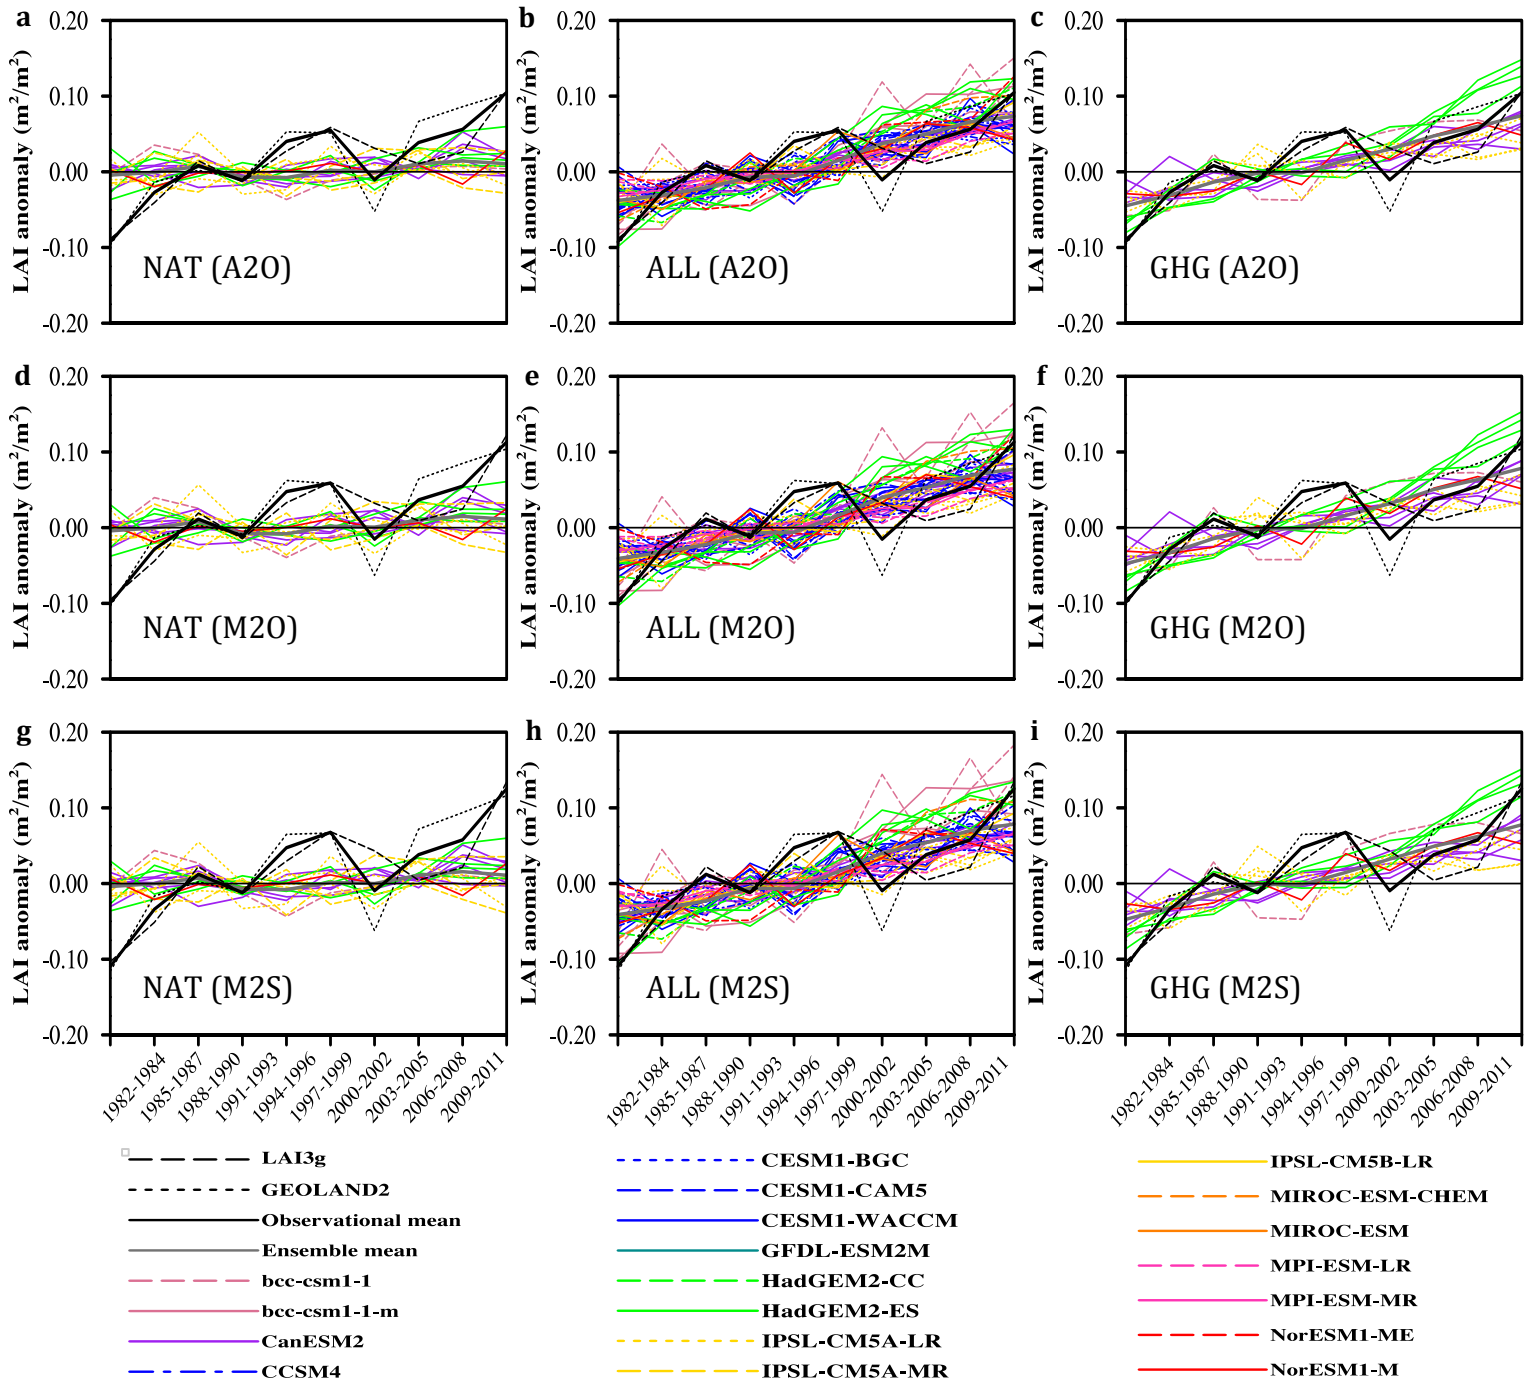

**Figure S3. Observed and simulated 1982–2011 time series of LAI anomalies.** The 3-year mean Growing Season (a–c for April–October [A20], d–f for May–October [M2O], and g–i for May–September [M2S]) LAI anomalies ( $\text{m}^2/\text{m}^2$ ) over land of the northern-extratropical latitudes (NEL) for the LAI3g product, GEOLAND2 product, mean of LAI3g and GEOLAND2, individual CMIP5 simulations accounting for solely natural forcings (NAT), and both anthropogenic and natural forcings (ALL), as well as CMIP5 simulations accounting for greenhouse gas forcings (GHG). Specific information on the model name and ensemble size of each model can be referred to Table S1.

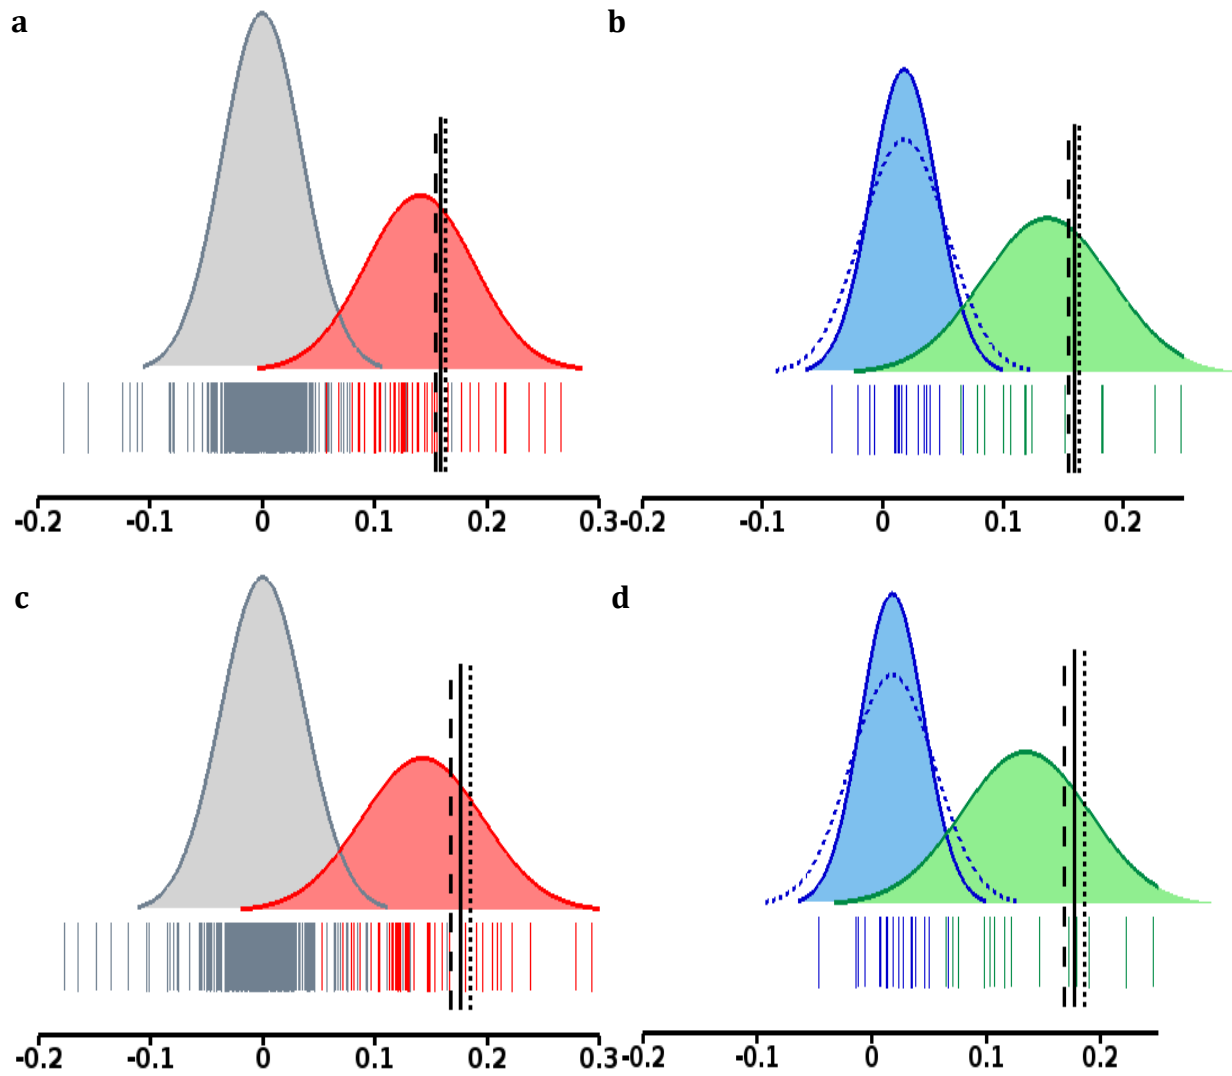

**Figure S4.** This is similar to Fig. 3, but considers different definitions of the growing season LAI (a and b for May–October [M2O], c and d for May–September [M2S]).

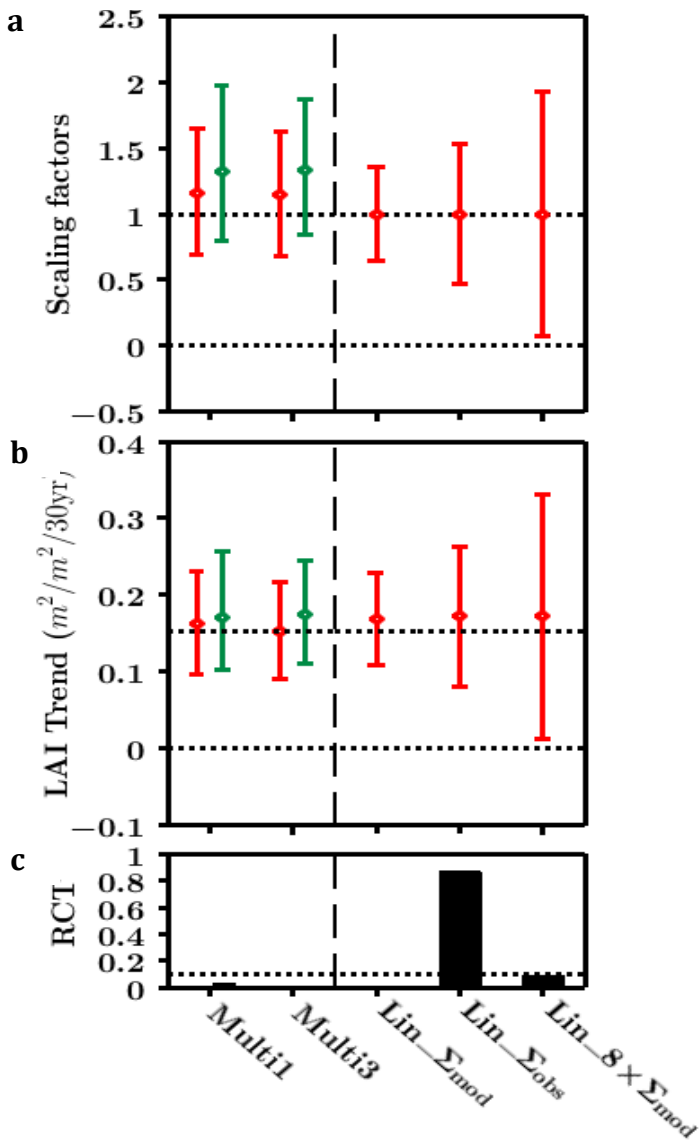

**Figure S5: Sensitivity of optimal D&A to inflated variance assumptions.** The optimal D&A analysis shown in Fig. 4 of the main text (Multi1 and Multi3 response patterns) is compared to results obtained considering a simplified method (linear trend and OLS fit, see text) and assuming an inflated IV. IV is estimated from unforced preindustrial simulations (Lin\_Σmod), the observations (Lin\_Σobs), or inflated arbitrarily by a factor of 8 (Lin\_8xΣmod). Scaling factors, attributable trends, and the p-value of the residual consistency test are shown as being consistent with those in the Fig. 4.

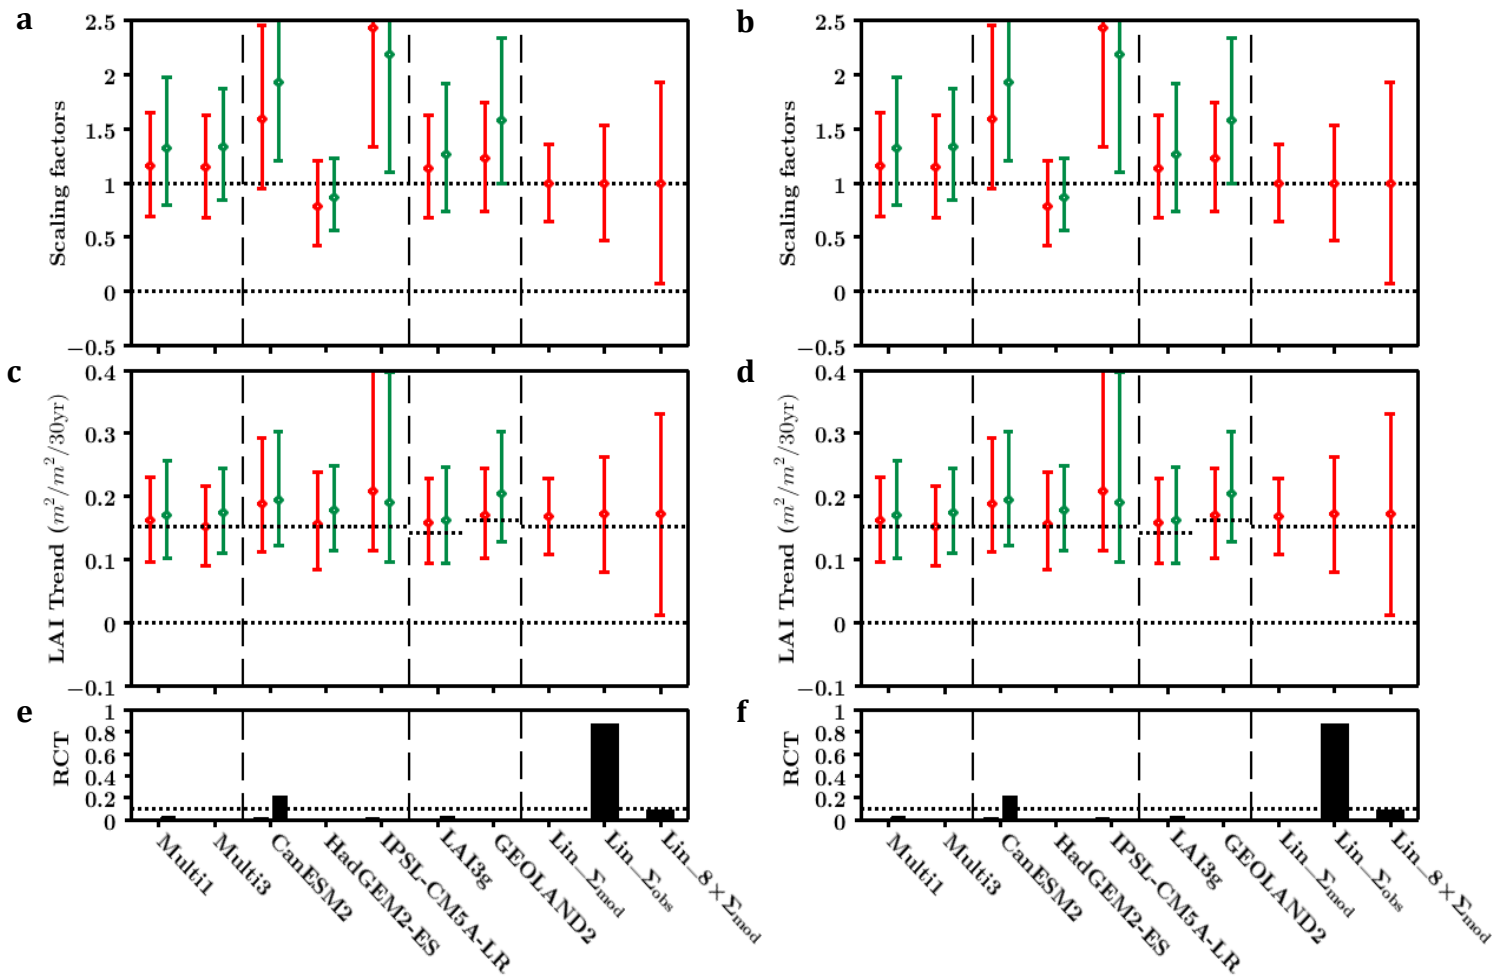

**Figure S6. Results for the optimal D&A using alternative growing season definitions.** This is similar to the merged Figs. 4 and S5, but considers different definitions of the growing season LAI (a, c, and e for May–October [M2O], b, d, and f for May–September [M2S]).

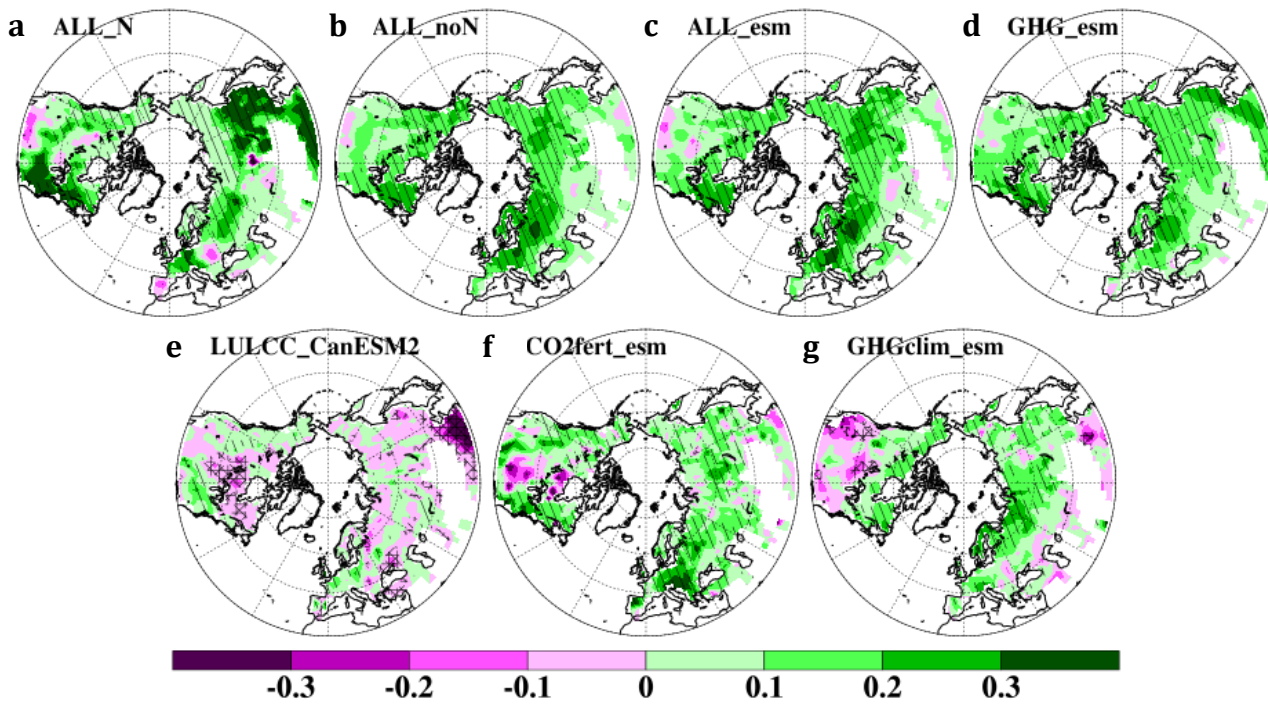

**Figure S7. Spatial distribution of LAI trends for 1982–2011.** Spatial distribution of the linear trends in the growing season (April–October) LAI ( $\text{m}^2/\text{m}^2/30\text{yr}$ ) in

- (a) CMIP5 simulations with anthropogenic and natural forcings for those models having dynamic nitrogen process (i.e., having the CLM4 model [ALL\_N]),
- (b) CMIP5 simulations with anthropogenic and natural forcings for those models having no dynamic nitrogen process (ALL\_noN),
- (c) CMIP5 simulations with anthropogenic and natural forcings for those models having esmFixClim2 ( $\text{CO}_2$ -induced physiological effects, radiation code sees constant  $\text{CO}_2$  concentration of year 1850, but carbon cycle sees historical followed by RCP4.5 rise in  $\text{CO}_2$ ) or esmFdbk2 (GHG-induced climate effects, carbon cycle sees constant  $\text{CO}_2$  concentration of year 1850, but radiation sees historical followed by RCP4.5 rise in  $\text{CO}_2$ ) experiments (ALL\_esm),
- (d) CMIP5 simulations with greenhouse gases forcings for those models having esmFixClim2 or esmFdbk2 experiments (GHG\_esm),
- (e) CanESM2 simulations with land use/land cover change only (LULCC\_CanESM2),
- (f) the esmFixClim2 simulations (CO2fert\_esm), and
- (g) the esmFdbk2 simulations (GHGclim\_esm).

The hatched area indicates at least 90% of the simulation members agree on the increasing trend of LAI, and area with black crosses indicates at least 90% percent of the simulation members agree on the decreasing trend of LAI. These figures are designed to provide insights on the possible processes behind the anthropogenic impacts (e.g., nitrogen deposition, land use/land cover change, and the  $\text{CO}_2$ -induced physiological vs. GHG-induced climate effects) on the vegetation growth.

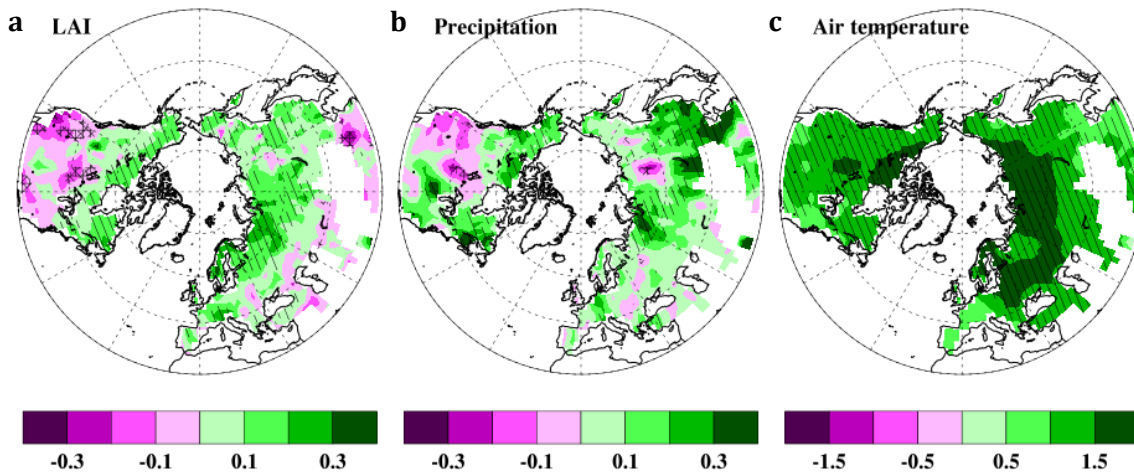

**Figure S8. Spatial distribution of LAI, precipitation and temperature trends for 1982–2011.** Spatial distribution of the trends in the growing season (April–October)

(a) climate-induced LAI ( $\text{m}^2/\text{m}^2/30\text{yr}$ ),

(b) precipitation ( $\text{mm}/\text{day}/30\text{yr}$ ), and

(c) temperature ( $^{\circ}\text{C}/30\text{yr}$ ) from the CMIP5 esmFdbk2 simulations (GHG-induced climate effects, carbon cycle sees constant  $\text{CO}_2$  concentration of year 1850, but radiation sees historical followed by RCP4.5 rise in  $\text{CO}_2$ ).

The hatched area indicates at least 90% of the simulation members agree on the increasing trends, and area with black crosses indicates at least 90% percent of the simulation members agree on the decreasing trends. The (a) is identical to that of Fig. S7g. These figures are designed to provide insights on the possible climatic drivers of LAI changes for the GHG-induced climate change shown in Fig. S7g.

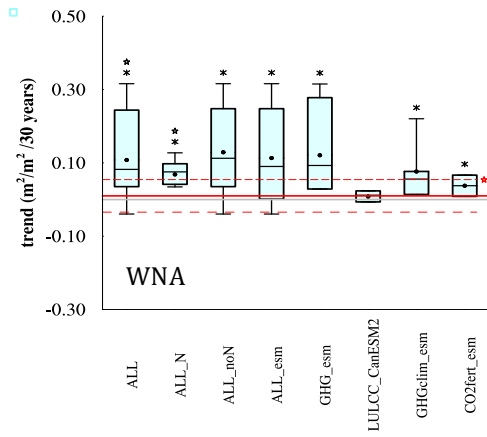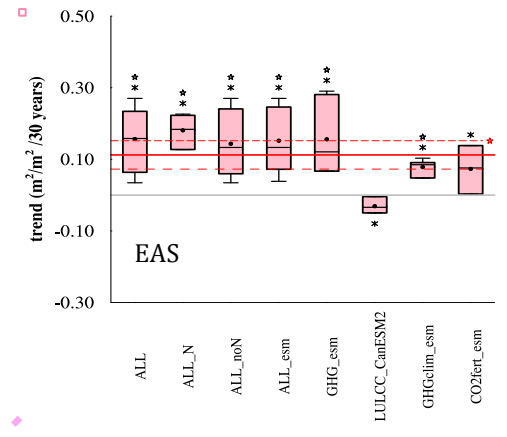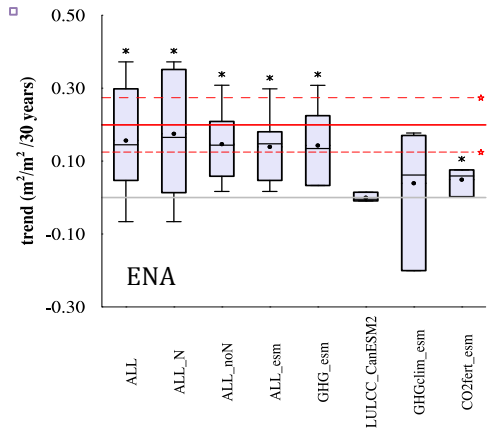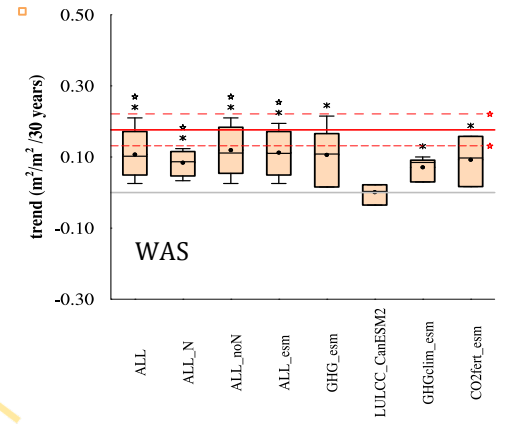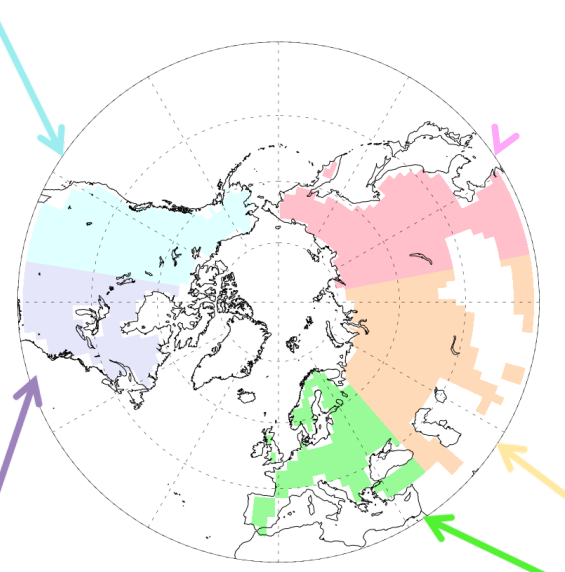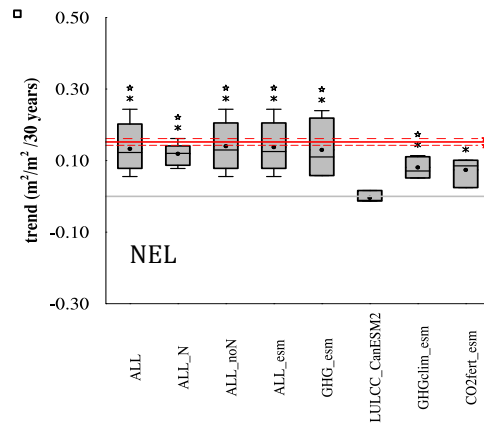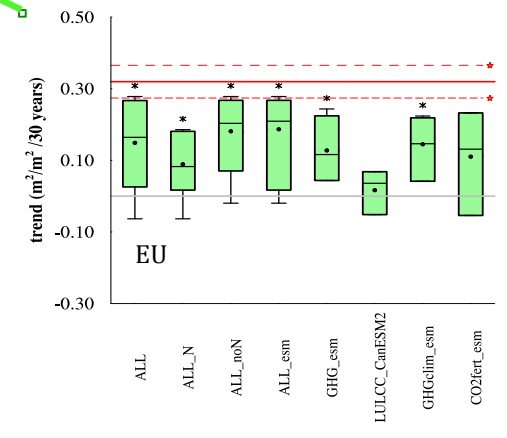



**Figure S9. Regional summaries of LAI trends for 1982-2011.** Linear trends in the growing season (April–October) LAI ( $\text{m}^2/\text{m}^2/30\text{yr}$ ) of CMIP5 simulations with anthropogenic and natural forcings (ALL) CMIP5 simulations with anthropogenic and natural forcings for those models having dynamic nitrogen process, which means having the CLM4 model (ALL\_N), CMIP5 simulations with anthropogenic and natural forcings for those models having no dynamic nitrogen process (ALL\_noN), CMIP5 simulations with anthropogenic and natural forcings for those models having esmFixClim2 ( $\text{CO}_2$ -induced physiological effects, radiation code sees constant  $\text{CO}_2$  concentration of year 1850, but carbon cycle sees historical followed by RCP4.5 rise in  $\text{CO}_2$ ) or esmFdbk2 (GHG-induced climate effects, carbon cycle sees constant  $\text{CO}_2$  concentration of year 1850, but radiation sees historical followed by RCP4.5 rise in  $\text{CO}_2$ ) experiments (ALL\_esm), CMIP5 simulations with greenhouse gases forcings for those models having esmFixClim2 or esmFdbk2 experiments (GHG\_esm), CanESM2 simulations with land use/land cover change only (LULCC\_CanESM2), the esmFixClim2 simulations, and the esmFdbk2 simulations over land of northern-extratropical latitudes (NEL), western North America (WNA), eastern North America (ENA), Europe (EU) and western Asia (WAS), and eastern Asia (EAS). Boxes indicate 10% and 90% percentiles and bars represent the minimum and maximum value of all ensemble runs. Median and mean values are shown by the bar and dot inside each box. Stars above/below bars indicate at least 90% of ensemble runs agree on positive/negative trends. In addition, the asterisks above/below bars indicate at least 90% of ensemble runs agree on significantly positive/negative trends. The two red dashed lines indicate the trends from LAI3g (short dash) and GEOLAND2 (long dash), and the solid red line shows the average trend of the two observations. A star is shown to the right end of each red dashed line if the trend is significantly positive. The grey solid line is the reference line across zero.
